# Supplementary material for: MKS-NPHP module proteins control ciliary shedding at the transition zone
Source: PubMed Central journal article supplement (PMC7093003; doi:10.1371/journal.pbio.3000640), 2020-03-12
Supplement: pbio.3000640.s008.pdf [file pbio.3000640.s008.pdf]

**Table S1: ID list of transition zone proteins in *Paramecium***

| GENE NAME            | GENE ID            |
|----------------------|--------------------|
| MKS1                 | PTET.51.1.G0320263 |
| MKS2/TMEM216         | PTET.51.1.G0150351 |
|                      | PTETP2500008001    |
|                      | PTET.51.1.G0300269 |
| MKS3/TMEM67/MECKELIN | PTET.51.1.G0460260 |
| AHI1                 | PTET.51.1.G0800017 |
|                      | PTET.51.1.G1620035 |
| B9D1                 | PTET.51.1.G1150027 |
|                      | PTET.51.1.G1130142 |
| B9D2                 | PTET.51.1.G1470056 |
|                      | PTET.51.1.G0610100 |
|                      | PTET.51.1.G0280188 |
| CC2D2A               | PTET.51.1.G0190283 |
| TECTONIC (1,2 and 3) | PTET.51.1.G0700187 |
| TMEM17               | PTET.51.1.P0500202 |
|                      | PTET.51.1.P1210132 |
|                      | PTET.51.1.P0380214 |
| TMEM107              | PTET.51.1.G0300250 |
|                      | PTET.51.1.P0310017 |
| TMEM218              | -                  |
| TMEM231              | PTET.51.1.P1340134 |
|                      | PTET.51.1.P0010036 |
| TMEM237              | -                  |
| NPHP1                | PTET.51.1.G5560037 |
|                      | PTET.51.1.G1530007 |
| NPHP4/POC10          | PTET.51.1.P0020231 |
|                      | PTET.51.1.G0220034 |
|                      | PTET.51.1.P0290127 |
|                      | PTET.51.1.P0130026 |
| NPHP5/IQCB1          | -                  |
| NPHP3/MKS7           | PTET.51.1.P0280102 |
|                      | PTET.51.1.P0610178 |
|                      | PTET.51.1.G0340120 |
|                      | PTET.51.1.P0480171 |
| CEP290/NPHP6/MKS4    | PTET.51.1.G0130345 |
|                      | PTET.51.1.P0190305 |
| RPGRIP1L/NPHP8       | PTET.51.1.G0340252 |
|                      | PTET.51.1.G0480042 |
